# Supplementary material for: Retrospective Analysis of Clinical Genetic Testing in Pediatric Primary Dilated Cardiomyopathy: Testing Outcomes and the Effects of Variant Reclassification
Source: PubMed Central journal article supplement — J Am Heart Assoc. 2020 May 27;9(11):e016195. doi: 10.1161/JAHA.120.016195 (PMC7428992; doi:10.1161/jaha.120.016195), 2020-05-27
Supplement: JAH3-9-e016195-s001.pdf [file JAH3-9-e016195-s001.pdf]

# **SUPPLEMENTAL MATERIAL**

**Table S1. Cardiomyopathy gene testing panels.**

| Panel | DCM-pnlA | DCM-pnlB | PCM-pnlD | DCM-pnlC | PCM-pnlCv2 | PCM-pnlA | PCM-pnlAv2 | PCM-pnlCv3 | PCM-pnlAv3 |
|-------|----------|----------|----------|----------|------------|----------|------------|------------|------------|
| Genes | MYBPC3   | LDB3     | CASQ2    | ABCC9    | ABCC9      | ABCC9    | ABCC9      | ABCC9      | ABCC9      |
|       | MYH7     | LMNA     | DSC2     | ACTC1    | ACTC1      | ACTC1    | ACTC1      | ACTC1      | ACTC1      |
|       | TNNI3    | ACTC1    | DSG2     | ACTN2    | ACTN2      | ACTN2    | ACTN2      | ACTN2      | ACTN2      |
|       | TNNT2    | PLN      | DSP      | CSRP3    | BAG3       | ANKRD1   | ANKRD1     | BAG3       | ANKRD1     |
|       | TPM1     | TAZ      | JUP      | CTF1     | CSRP3      | CASQ2    | BAG3       | CASQ2      | BAG3       |
|       |          |          | PKP2     | DES      | CTF1       | CAV3     | CASQ2      | CHRM2      | CASQ2      |
|       |          |          | RYR2     | EMD      | DES        | CRYAB    | CAV3       | CRYAB      | CAV3       |
|       |          |          | TMEM43   | LDB3     | EMD        | CSRP3    | CRYAB      | CSRP3      | CHRM2      |
|       |          |          |          | LMNA     | GATAD1     | CTF1     | CSRP3      | DES        | CRYAB      |
|       |          |          |          | MYBPC3   | LAMP2      | DES      | CTF1       | DMD        | CSRP3      |
|       |          |          |          | MYH7     | LDB3       | DSC2     | DES        | DOLK       | DES        |
|       |          |          |          | PLN      | LMNA       | DSG2     | DSC2       | DSC2       | DMD        |
|       |          |          |          | SGCD     | MYBPC3     | DSP      | DSG2       | DSG2       | DOLK       |
|       |          |          |          | TAZ      | MYH7       | DTNA     | DSP        | DSP        | DSC2       |
|       |          |          |          | TCAP     | NEXN       | EMD      | DTNA       | DTNA       | DSG2       |
|       |          |          |          | TNNI3    | PLN        | FHL2     | EMD        | EMD        | DSP        |
|       |          |          |          | TNNT2    | RBM20      | GLA      | FHL2       | GATAD1     | DTNA       |
|       |          |          |          | TPM1     | SCN5A      | JUP      | GATAD1     | GLA        | EMD        |
|       |          |          |          | VCL      | SGCD       | LAMA4    | GLA        | JUP        | FHL2       |
|       |          |          |          |          | TAZ        | LAMP2    | JUP        | LAMP2      | GATAD1     |
|       |          |          |          |          | TCAP       | LDB3     | LAMA4      | LDB3       | GLA        |
|       |          |          |          |          | TNNC1      | LMNA     | LAMP2      | LMNA       | ILK        |
|       |          |          |          |          | TNNI3      | MYBPC3   | LDB3       | MURC       | JPH2       |
|       |          |          |          |          | TNNT2      | MYH6     | LMNA       | MYBPC3     | JUP        |
|       |          |          |          |          | TPM1       | MYH7     | MYBPC3     | MYH6       | LAMA4      |
|       |          |          |          |          | TTN        | MYL2     | MYH6       | MYH7       | LAMP2      |
|       |          |          |          |          | VCL        | MYL3     | MYH7       | MYL2       | LDB3       |
|       |          |          |          |          |            | MYLK2    | MYL2       | MYL3       | LMNA       |
|       |          |          |          |          |            | MYOZ2    | MYL3       | MYOZ2      | MURC       |
|       |          |          |          |          |            | NEXN     | MYLK2      | MYPN       | MYBPC3     |
|       |          |          |          |          |            | PKP2     | MYOZ2      | NEBL       | MYH6       |
|       |          |          |          |          |            | PLN      | NEBL       | NEXN       | MYH7       |
|       |          |          |          |          |            | PRKAG2   | NEXN       | PKP2       | MYL2       |
|       |          |          |          |          |            | RBM20    | PKP2       | PLN        | MYL3       |
|       |          |          |          |          |            | RYR2     | PLN        | PRDM16     | MYLK2      |
|       |          |          |          |          |            | SGCD     | PRKAG2     | PRKAG2     | MYOM1      |
|       |          |          |          |          |            | TAZ      | RBM20      | PTPN11     | MYOZ2      |
|       |          |          |          |          |            | TCAP     | RYR2       | RAF1       | MYPN       |
|       |          |          |          |          |            | TMEM43   | SCN5A      | RBM20      | NEBL       |
|       |          |          |          |          |            | TNNC1    | SGCD       | RYR2       | NEXN       |

|  |  |  |  |  |  |              |               |               |               |
|--|--|--|--|--|--|--------------|---------------|---------------|---------------|
|  |  |  |  |  |  | <i>TNNI3</i> | <i>TAZ</i>    | <i>SCN5A</i>  | <i>PDLIM3</i> |
|  |  |  |  |  |  | <i>TNNT2</i> | <i>TCAP</i>   | <i>SGCD</i>   | <i>PKP2</i>   |
|  |  |  |  |  |  | <i>TPM1</i>  | <i>TMEM43</i> | <i>TAZ</i>    | <i>PLN</i>    |
|  |  |  |  |  |  | <i>TTN</i>   | <i>TMPO</i>   | <i>TCAP</i>   | <i>PRDM16</i> |
|  |  |  |  |  |  | <i>TTR</i>   | <i>TNNC1</i>  | <i>TMEM43</i> | <i>PRKAG2</i> |
|  |  |  |  |  |  | <i>VCL</i>   | <i>TNNI3</i>  | <i>TNNC1</i>  | <i>PTPN11</i> |
|  |  |  |  |  |  |              | <i>TNNT2</i>  | <i>TNNI3</i>  | <i>RAF1</i>   |
|  |  |  |  |  |  |              | <i>TPM1</i>   | <i>TNNT2</i>  | <i>RBM20</i>  |
|  |  |  |  |  |  |              | <i>TTN</i>    | <i>TPM1</i>   | <i>RYR2</i>   |
|  |  |  |  |  |  |              | <i>TTR</i>    | <i>TRDN</i>   | <i>SCN5A</i>  |
|  |  |  |  |  |  |              | <i>VCL</i>    | <i>TTN</i>    | <i>SGCD</i>   |
|  |  |  |  |  |  |              |               | <i>TTR</i>    | <i>TAZ</i>    |
|  |  |  |  |  |  |              |               | <i>VCL</i>    | <i>TCAP</i>   |
|  |  |  |  |  |  |              |               |               | <i>TMEM43</i> |
|  |  |  |  |  |  |              |               |               | <i>TNNC1</i>  |
|  |  |  |  |  |  |              |               |               | <i>TNNI3</i>  |
|  |  |  |  |  |  |              |               |               | <i>TNNT2</i>  |
|  |  |  |  |  |  |              |               |               | <i>TPM1</i>   |
|  |  |  |  |  |  |              |               |               | <i>TRDN</i>   |
|  |  |  |  |  |  |              |               |               | <i>TTN</i>    |
|  |  |  |  |  |  |              |               |               | <i>TTR</i>    |
|  |  |  |  |  |  |              |               |               | <i>VCL</i>    |

Genes included in cardiomyopathy sequencing panels. Testing panels expanded from 5 to 62 genes over the study period.

**Table S2. Relationship between number of genes tested and test result.**

| Test Result              |                     | Positive |       | Inconclusive |       | Negative |       |
|--------------------------|---------------------|----------|-------|--------------|-------|----------|-------|
| Re-classification status |                     | Before   | After | Before       | After | Before   | After |
| Number of genes tested   | <b>&lt;= 10</b>     | 1/6      | 3/6   | 3/6          | 1/6   | 2/6      | 1/6   |
|                          | <b>&gt; 10 - 50</b> | 4/24     | 3/24  | 13/24        | 11/24 | 7/24     | 10/24 |
|                          | <b>&gt; 50</b>      | 11/33    | 9/33  | 22/33        | 20/33 | 0/33     | 4/33  |
|                          | <b>All</b>          | 16/63    | 15/63 | 38/63        | 32/63 | 9/63     | 15/63 |

Test results before and after variant reclassification as a proportion of the total number of tests are shown. Tests are grouped by number of genes tested. Positive tests include those with pathogenic or likely pathogenic variants. Negative tests include those with benign or likely benign variants. Inconclusive tests include those with VUS's that do not meet positive test criteria. Variants that were ultimately determined to be disease causing at the discretion of the clinician are grouped with their original testing result as issued by the laboratory.

**Table S3. Number of variants identified by genetic testing panel.**

| <b>Panel(s) Tested</b>                       | <b>DCM-<br/>pnlA</b> | <b>DCM-<br/>pnlB</b> | <b>PCM-<br/>pnlD</b> | <b>DCM-<br/>pnlA,<br/>DCM-<br/>pnlB</b> | <b>DCM-<br/>pnlC</b> | <b>PCM-<br/>pnlCv2</b> | <b>PCM-<br/>pnlA</b> | <b>PCM-<br/>pnlAv2</b> | <b>PCM-<br/>pnlCv3</b> | <b>PCM-<br/>pnlAv3</b> |
|----------------------------------------------|----------------------|----------------------|----------------------|-----------------------------------------|----------------------|------------------------|----------------------|------------------------|------------------------|------------------------|
| <b>Number of genes tested</b>                | 5                    | 5                    | 8                    | 10                                      | 19                   | 27                     | 46                   | 51                     | 53                     | 62                     |
| <b>Number of tests performed</b>             | 1                    | 1                    | 1                    | 3                                       | 18                   | 5                      | 1                    | 9                      | 1                      | 23                     |
| <b>Number of causal variants* identified</b> | 0                    | 1                    | 0                    | 2                                       | 5                    | 1                      | 0                    | 4                      | 0                      | 6                      |

Genetic testing by gene panel. A list of genes for each panel can be found in Table S2. \*includes Likely pathogenic and pathogenic variants as per ACMG/AMP classification criteria, as well as those classified as VUS favor pathogenic where clinical judgement was used to override the initial variant classification following clinical assessment

**Figure S1. Patient selection scheme.**

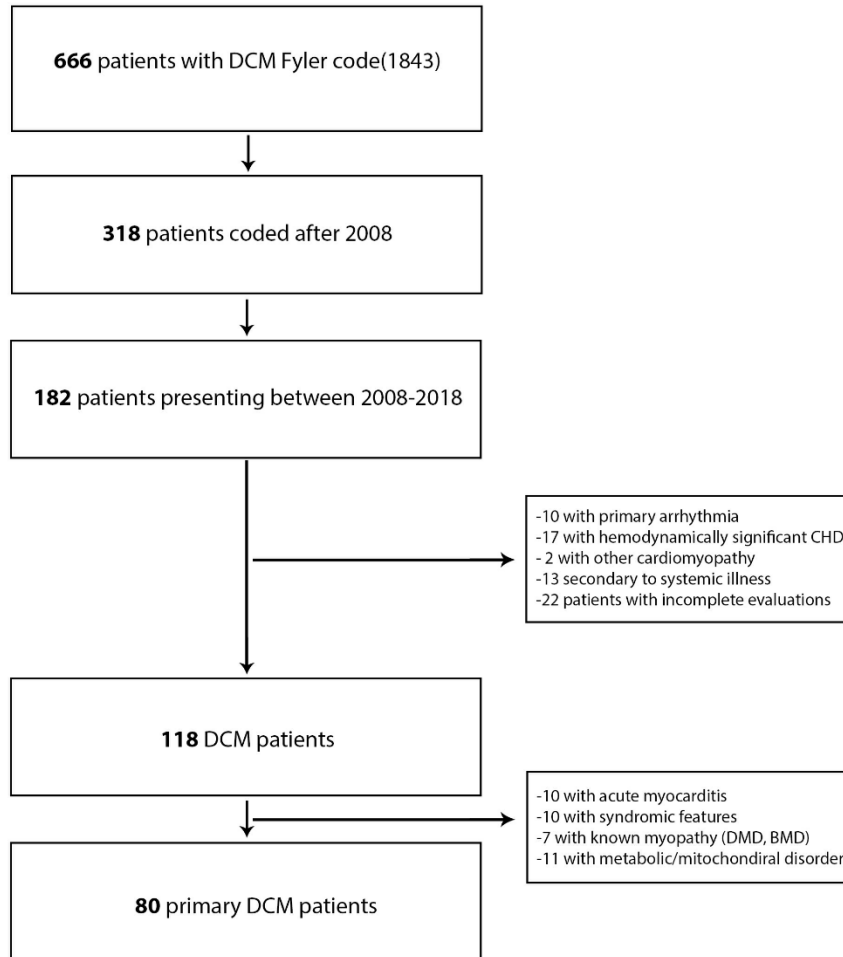

80 patients with primary DCM were identified within the study period. 73 patients were probands without prior genetic evaluations, and 63 probands that underwent genetic testing included in this study.
